# Supplementary material
Source: PubMed Central journal article supplement (PMC7279742)
Supplement: mmc1.pdf [file mmc1.pdf]

# THE LANCET

## Microbe

### **Supplementary appendix**

This appendix formed part of the original submission and has been peer reviewed. We post it as supplied by the authors.

Supplement to: Adler H, Ball R, Fisher M, et al. Low rate of bacterial co-infection in patients with COVID-19. *Lancet Microbe* 2020; **1**: e62.

**Table 1:**

|                                           | <b>Demographics</b> |                                                                                                                 |
|-------------------------------------------|---------------------|-----------------------------------------------------------------------------------------------------------------|
| Total, n.                                 | 195                 |                                                                                                                 |
| Male, n (%)                               | 118 (60.5%)         |                                                                                                                 |
| Age in years, median (IQR)                | 69 (59–81)          |                                                                                                                 |
| ICU admission, no.                        | 24                  |                                                                                                                 |
|                                           | <b>Outcomes</b>     |                                                                                                                 |
| Remains inpatient, n (%)                  | 16 (8.2%)           |                                                                                                                 |
| Discharged, n (%)                         | 117 (60.0%)         |                                                                                                                 |
| Transferred out, n (%)                    | 8 (4.1%)            |                                                                                                                 |
| Died, n (%)                               | 54 (27.7%)          |                                                                                                                 |
| <b>Microbiology results</b>               |                     |                                                                                                                 |
| No. patients positive/patients tested (%) |                     |                                                                                                                 |
| Blood cultures: Pathogens                 | 2/128 (1.6%)        | <i>Streptococcus pneumoniae</i>                                                                                 |
| Lower respiratory tract cultures:         |                     |                                                                                                                 |
| Pathogens                                 | 0/25                |                                                                                                                 |
| Likely contaminants                       | 5/25                | <i>E coli</i> (n=2), <i>Pseudomonas</i> species (n=1), <i>Serratia</i> species (n=1), <i>Aspergillus</i> (n=1)* |
| Urinary pneumococcal antigen†             | 3/29                |                                                                                                                 |
| Urinary <i>Legionella</i> antigen†        | 1/31                |                                                                                                                 |

Clinical characteristics and microbiology results of patients admitted with COVID-19. ICU, intensive care unit.

\* This patient had no clinical or radiological features of aspergillosis, and was discharged home after a week's hospitalisation without any antifungal treatment.

†BinaxNOW
